# Supplementary material for: The effect of potassium on steam-methane reforming on the Ni4/Al2O3surface: a DFT study
Source: Royal Society of Chemistry journal article supplement (doi:10.1039/c7cy00986k), 2017-01-01
Supplement: c7cy00986k1.pdf [file c7cy00986k1.pdf]

## Supporting information

# The Effect of Potassium on the Steam-Methane Reforming on the Ni<sub>4</sub>/Al<sub>2</sub>O<sub>3</sub> Surface: A DFT study

Meng-Ru Li, Zhe Lu and Gui-Chang Wang\*

(College of Chemistry, Key Laboratory of Advanced Energy Materials Chemistry  
(Ministry of Education) and Collaborative Innovation Center of Chemical Science  
and Engineering (Tianjin), Nankai University, Tianjin 300071, P. R. China)

\*Corresponding author: Gui-Chang Wang. E-mail: [wangguichang@nankai.edu.cn](mailto:wangguichang@nankai.edu.cn)

Telephone: +86-22-23503824 (O) Fax: +86-22-23502458

## S1 The physical origin of energy barrier in CH<sub>3</sub> and C formation

In order to get the insight of the main factor for the different barriers for CH<sub>4</sub> and CH species on Ni<sub>4</sub>/Al<sub>2</sub>O<sub>3</sub> and K pre-adsorbed Ni<sub>4</sub>/Al<sub>2</sub>O<sub>3</sub>, the energetic method developed by Hammer<sup>1</sup> is used for reactions on clean and K pre-adsorbed Ni<sub>4</sub>/Al<sub>2</sub>O<sub>3</sub>: CH<sub>4</sub>→CH<sub>3</sub>+H and CH→C+H. For reaction AB→A+B, the barrier can be divided into five terms in equation (1):

$$E_a = \Delta E_{AB}^g + E_{AB}^{IS} + E_{int}^{TS} - E_A^{TS} - E_B^{TS} \quad (1)$$

Where  $\Delta E_{AB}^g$ ,  $E_{AB}^{IS}$ ,  $E_{int}^{TS}$ ,  $E_A^{TS}$  and  $E_B^{TS}$  refer to the bond energy of the gas-phase AB,

the adsorption energy of AB in the IS, a quantitative measurement of interaction between A and B in TS and the adsorption energy of A and B at the TS geometry, respectively.

**CH<sub>4</sub>→CH<sub>3</sub>+H** On Ni<sub>4</sub>/Al<sub>2</sub>O<sub>3</sub> and K pre-adsorbed Ni<sub>4</sub>/Al<sub>2</sub>O<sub>3</sub>, K will promote the C-H scission with a lower barrier of 0.54 eV than that on clean Ni<sub>4</sub>/Al<sub>2</sub>O<sub>3</sub> (0.63 eV). The interaction between CH<sub>3</sub> and H in TS ( $E_{\text{int}}^{\text{TS}}$ ) on clean and K pre-adsorbed Ni<sub>4</sub>/Al<sub>2</sub>O<sub>3</sub> are approximate shown in Table S1. The higher adsorption energies of CH<sub>3</sub> ( $E_A^{\text{TS}}$ ) and H species ( $E_B^{\text{TS}}$ ) in TS on K pre-adsorbed Ni<sub>4</sub>/Al<sub>2</sub>O<sub>3</sub> will make up the higher adsorption energy of CH<sub>4</sub> in IS ( $E_{AB}^{\text{IS}}$ ) on K pre-adsorbed Ni<sub>4</sub>/Al<sub>2</sub>O<sub>3</sub>, which gives rise to the lower barrier at the presence of K. As a result, the stronger interaction between the TS species and catalyst ( $E_A^{\text{TS}}$  and  $E_B^{\text{TS}}$ ) contributes to the promotion effect of K on C-H cleavage in CH<sub>4</sub>.

In conclusion, the adsorption energy of TS species is the main factor for the promotion effect of K: the higher adsorption energy of TS species (CH<sub>3</sub> and H species) on K pre-adsorbed Ni<sub>4</sub>/Al<sub>2</sub>O<sub>3</sub> will decrease the barrier of C-H scission in CH<sub>4</sub>. Since the adsorption energy of CH<sub>4</sub> in IS are weak and approximate, the adsorption energies of the CH<sub>3</sub> and H species in TS configuration will be related to the adsorption energies of the CH<sub>3</sub> and H species closely. As shown in Table 1, the higher adsorption energies of CH<sub>3</sub> and H species on K pre-adsorbed Ni<sub>4</sub>/Al<sub>2</sub>O<sub>3</sub> are in good agreement with the higher adsorption energies of the CH<sub>3</sub> and H species in TS configuration.

**CH→C+H** On clean and K pre-adsorbed Ni<sub>4</sub>/Al<sub>2</sub>O<sub>3</sub>, the adsorption energies of CH species on clean and K pre-adsorbed Ni<sub>4</sub>/Al<sub>2</sub>O<sub>3</sub> are -6.64 eV and -6.56 eV. The adsorption energy of H species in TS configuration ( $-E_B^{\text{TS}}$ ) on K pre-adsorbed

Ni<sub>4</sub>/Al<sub>2</sub>O<sub>3</sub> is -1.61 eV which is higher than that on clean Ni<sub>4</sub>/Al<sub>2</sub>O<sub>3</sub> (-0.95 eV). However, the lower adsorption energy of C species in TS configuration ( $-E_A^{TS}$ ) which is equal to -6.76 eV and the weaker interaction term  $E_{\text{int}}^{TS}$  (-0.62 eV) give rises to the higher barrier on Ni<sub>4</sub>/K-Al<sub>2</sub>O<sub>3</sub>. Among all the factors, we observed that the lower adsorption energy of the C species in TS configuration  $E_A^{TS}$  is the main factor for the higher barrier on K pre-adsorbed Ni<sub>4</sub>/Al<sub>2</sub>O<sub>3</sub>, and the adsorption energy of the C species in TS configuration is supposed to be related to the lower adsorption energy of the C species on Ni<sub>4</sub>/K-Al<sub>2</sub>O<sub>3</sub> than that on clean Ni<sub>4</sub>/Al<sub>2</sub>O<sub>3</sub> (-7.56 eV versus -7.40 eV for clean and K pre-adsorbed Ni<sub>4</sub>/Al<sub>2</sub>O<sub>3</sub>).

From the discussion above, it is obvious that the adsorption terms of TS are always the main factor affecting the barrier. Especially, the adsorption energies of CH<sub>3</sub> and C in TS geometry contribute to the different effects of K on C-H cleavage, and are supposed to be resulted from the adsorption energies of the CH<sub>3</sub> and H species. As shown in Figure S1(a), the K promotion effect on C-H cleavage increases in the first steps while the inhibition effect of K on C-H cleavage in the CH<sub>2</sub> and CH species turns stronger with the dehydrogenation steps going on. Furthermore, we will analysis the physical factor for K effect in the consecutive C-H cleavages forming CH<sub>x</sub> below.

**Table S1** Energy decomposition of the activation barrier in the dissociation of CH<sub>x</sub> on clean and K pre-adsorbed Ni<sub>4</sub>/Al<sub>2</sub>O<sub>3</sub> (unit: eV)

| Elementary step                     |                                                   | $\Delta E_{AB}^g$ | $E_{AB}^{IS}$ | $E_{\text{int}}^{TS}$ | $E_A^{TS}$ | $E_B^{TS}$ |
|-------------------------------------|---------------------------------------------------|-------------------|---------------|-----------------------|------------|------------|
| CH <sub>4</sub> →CH <sub>3</sub> +H | Ni <sub>4</sub> /Al <sub>2</sub> O <sub>3</sub>   | 4.85              | -0.05         | 0.04                  | 1.98       | 2.23       |
|                                     | Ni <sub>4</sub> /K-Al <sub>2</sub> O <sub>3</sub> | 4.85              | 0.14          | 0.08                  | 2.11       | 2.42       |

|                                                  |                                       |      |      |       |      |      |
|--------------------------------------------------|---------------------------------------|------|------|-------|------|------|
| $\text{CH}_3 \rightarrow \text{CH}_2 + \text{H}$ | $\text{Ni}_4/\text{Al}_2\text{O}_3$   | 5.04 | 2.40 | -0.44 | 4.11 | 2.09 |
|                                                  | $\text{Ni}_4/\text{K-Al}_2\text{O}_3$ | 5.04 | 2.42 | -0.08 | 4.48 | 2.37 |
| $\text{CH}_2 \rightarrow \text{CH} + \text{H}$   | $\text{Ni}_4/\text{Al}_2\text{O}_3$   | 4.84 | 4.28 | -0.55 | 6.47 | 1.74 |
|                                                  | $\text{Ni}_4/\text{K-Al}_2\text{O}_3$ | 4.84 | 4.63 | -0.56 | 6.59 | 1.65 |
| $\text{CH} \rightarrow \text{C} + \text{H}$      | $\text{Ni}_4/\text{Al}_2\text{O}_3$   | 3.54 | 6.64 | -1.10 | 7.41 | 0.95 |
|                                                  | $\text{Ni}_4/\text{K-Al}_2\text{O}_3$ | 3.54 | 6.56 | -0.62 | 6.76 | 1.61 |

Note: A and B refer to the  $\text{CH}_x$  and H species.

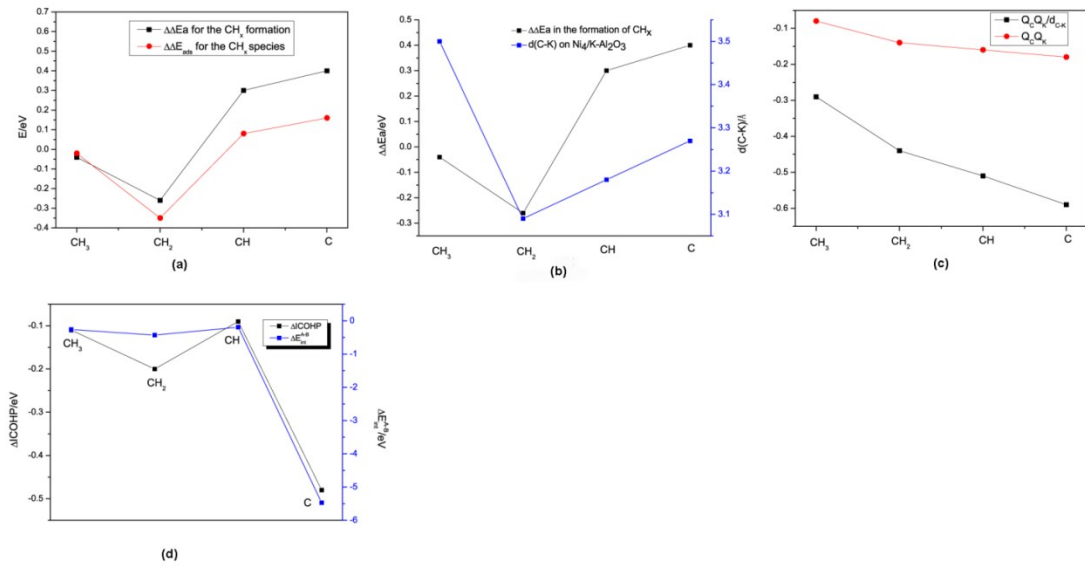

**Figure S1.** The change of  $\Delta\Delta E_a$  for the  $\text{CH}_x$  species formation and  $\Delta\Delta E_{\text{ads}}$  for  $\text{CH}_x$  species with  $x$  ranging from 3 to 0 (a); The change of the distance between C and K in  $\text{CH}_x$  species ( $d(\text{C-K})$ ) with  $x$  ranging from 3 to 0 (b); The  $Q_c Q_k$  and  $\frac{Q_c Q_k}{d_{\text{C-K}}}$  with  $x$  ranging from 3 to 0 (c); The  $\Delta\text{ICOHP}$  for

C-Ni interaction on K pre-adsorbed and clean  $\text{Ni}_4/\text{Al}_2\text{O}_3$  and  $\Delta E_{\text{int}}^{A-B}$  with  $x$  ranging from 3 to 0

Note:  $\Delta\Delta E_a$  refers to the difference between the barriers of the  $\text{CH}_x$  species formation on K pre-adsorbed and clean  $\text{Ni}_4/\text{Al}_2\text{O}_3$ ,  $\Delta\Delta E_{\text{ads}}$  is denoted as the difference between the adsorption energies of the  $\text{CH}_x$  species on K pre-adsorbed and clean  $\text{Ni}_4/\text{Al}_2\text{O}_3$ ,  $\Delta\text{ICOHP}$  is the difference between the integrated COHP values of the interaction of C-Ni in  $\text{CH}_x$  species on K pre-adsorbed and clean  $\text{Ni}_4/\text{Al}_2\text{O}_3$ .  $\Delta E_{\text{int}}^{A-B}$  is the difference of the interaction energy between the  $\text{CH}_x$  species and catalyst on K pre-adsorbed and clean  $\text{Ni}_4/\text{Al}_2\text{O}_3$ .  $Q_c$  and  $Q_k$  is calculated by Bader

charge analysis shown in Table S1 in the supporting information.

## **S2 The physical origin of $E_a$ in $CH_x$ formation**

As is shown in Figure S1(a), the reaction barrier difference of C-H scission yielding  $CH_x$  ( $x=0-3$ ) species between K pre-adsorbed and clean  $Ni_4/Al_2O_3$  ( $\Delta\Delta E_a$ ) varies from -0.04 eV, -0.26 eV to 0.30 eV and 0.40 eV. The K effect turns from promotion effect to inhibition effect on the C-H scission forming  $CH_x$ . In order to explore the origin of the physical factor of the change, we divided the barrier along the dehydrogenation process. From Table S1, it could be obtained that generally the adsorption energy of  $CH_x$  species in TS configuration ( $-E_A^{TS}$ ) is the main factor for the barrier. The adsorption energies of the  $CH_x$  species in TS configuration are related to the adsorption energies of the corresponding resulted species as the  $CH_3$ ,  $CH_2$ ,  $CH$  and  $C$  species. In addition, Figure S1(a) shows the adsorption energies difference of  $CH_x$  between K pre-adsorbed and clean  $Ni_4/Al_2O_3$  ( $\Delta\Delta E_{ads}$ ) will decrease from -0.02 eV in  $CH_3$  species to -0.35 eV in  $CH_2$  species firstly, and then increases to 0.08 and 0.16 eV in  $CH$  and  $C$  species, respectively. The trend of the adsorption energy of  $CH_x$  species is in line with that for the reaction barrier.

In conclusion, we find that the effect of K on the C-H scission forming  $CH_x$  changes from the promotion effect to inhibition effect with the dehydrogenation steps going on. Furthermore, the change is supposed to be resulted from the changing effect of K on the adsorption energy of  $CH_x$ . As a result, we will further explore the origin of changing effect of K on the  $CH_x$  species adsorption properties.

## **S3 The physical origin of $E_{ads}$ of $CH_x$ species**

In order to get the insight of the K effect on the adsorption energy of CH<sub>x</sub> species. We dissociate the adsorption energies of CH<sub>x</sub> species on clean and K pre-adsorbed Ni<sub>4</sub>/Al<sub>2</sub>O<sub>3</sub> into the deforming energy items and the interaction energy items corresponding to the interaction between the adsorbate and the catalyst:

$$E_{ads} = (E_A - E_A^g) + (E_B - E_B^g) + E_{int}^{A-B} = E_A^{deform} + E_B^{deform} + E_{int}^{A-B} \quad (2)$$

where the first two items  $E_A^{deform}$  and  $E_B^{deform}$  refer to the deforming energies which are required to deform the geometries of the adsorbate in gas ( $E_A^g$ ) and the catalyst ( $E_B^g$ ) before the adsorption process to the geometries of the adsorbate ( $E_A$ ) and the catalyst ( $E_B$ ) after the adsorption process. The last item  $E_{int}^{A-B}$  corresponds to the binding energy between the deformed adsorbate and catalyst. The interaction item  $E_{int}^{A-B}$  is assumed to be dissociated into three components in equation (3)<sup>2-4</sup>:

$$E_{int}^{A-B} = E_{elstat} + E_{Pauli} + E_{orb} \quad (3)$$

where  $E_{elstat}$  is the electrostatic interaction energy between the fragments,  $E_{Pauli}$  represents the repulsion interaction between the fragments and is responsible for any steric repulsion,  $E_{orb}$  refers to the 2-electron stabilizing interaction between occupied levels of one fragment and empty levels of the other.

**Table S2** Energy decomposition of the adsorption energy of CH<sub>x</sub> on clean and K pre-adsorbed Ni<sub>4</sub>/Al<sub>2</sub>O<sub>3</sub> (unit: eV)

| Species         |                                                 | $E_A^{deform}$ | $E_B^{deform}$ | $E_{int}^{A-B}$ | $\Delta E_A^{deform}$ | $\Delta E_B^{deform}$ | $\Delta E_{int}^{A-B}$ |
|-----------------|-------------------------------------------------|----------------|----------------|-----------------|-----------------------|-----------------------|------------------------|
| CH <sub>3</sub> | Ni <sub>4</sub> /Al <sub>2</sub> O <sub>3</sub> | 0.42           | 0.10           | -2.92           | 0.16                  | 0.08                  | -0.26                  |

|                 |                                                   |       |      |        |      |      |       |
|-----------------|---------------------------------------------------|-------|------|--------|------|------|-------|
|                 | Ni <sub>4</sub> /K-Al <sub>2</sub> O <sub>3</sub> | 0.58  | 0.18 | -3.18  |      |      |       |
| CH <sub>2</sub> | Ni <sub>4</sub> /Al <sub>2</sub> O <sub>3</sub>   | 0.04  | 0.22 | -4.28  | 0.06 | 0.02 | -0.43 |
|                 | Ni <sub>4</sub> /K-Al <sub>2</sub> O <sub>3</sub> | 0.10  | 0.24 | -4.97  |      |      |       |
| CH              | Ni <sub>4</sub> /Al <sub>2</sub> O <sub>3</sub>   | -0.01 | 0.58 | -6.64  | 0.01 | 0.26 | -0.19 |
|                 | Ni <sub>4</sub> /K-Al <sub>2</sub> O <sub>3</sub> | -0.00 | 0.84 | -7.40  |      |      |       |
| C               | Ni <sub>4</sub> /Al <sub>2</sub> O <sub>3</sub>   | 0.13  | 1.34 | -9.03  | 0.00 | 5.64 | -5.47 |
|                 | Ni <sub>4</sub> /K-Al <sub>2</sub> O <sub>3</sub> | 0.13  | 6.97 | -14.51 |      |      |       |

Note:  $E_A^{deform}$  ( $E_B^{deform}$ ) refers to the deforming energy of CH<sub>x</sub> (catalyst) which is the energy difference between the energies of the absorbed CH<sub>x</sub> species (catalyst) geometry in CH<sub>x</sub>-adsorbed catalyst and gas phase;  $E_{int}^{A-B}$  refer to the actual interaction energy between deformed CH<sub>x</sub> and catalyst geometry;  $\Delta E_A^{deform}$  ( $\Delta E_B^{deform}$ ) refer to the energy difference between the deforming energies of the absorbed CH<sub>x</sub> species (catalyst) geometry  $E_A^{deform}$  ( $E_B^{deform}$ ) on K pre-adsorbed and clean Ni<sub>4</sub>/Al<sub>2</sub>O<sub>3</sub>,  $\Delta E_{int}^{A-B}$  refer to the energy difference of the interaction energies between the absorbed CH<sub>x</sub> species and catalyst geometry  $E_{int}^{A-B}$  on K pre-adsorbed and clean Ni<sub>4</sub>/Al<sub>2</sub>O<sub>3</sub>.

From Table S2, on clean Ni<sub>4</sub>/Al<sub>2</sub>O<sub>3</sub>, it is observed that the deforming energies of the CH<sub>x</sub> species  $E_A^{deform}$  rang from 0.42 eV in CH<sub>3</sub>, 0.04 eV in CH<sub>2</sub>, -0.01 eV in CH to 0.13 eV in C. On the other hand, the deforming energies of the catalyst  $E_B^{deform}$  in the adsorption of CH<sub>x</sub> species increases from 0.10 eV (CH<sub>3</sub>), 0.22 eV (CH<sub>2</sub>), 0.58 (CH) to 1.34 eV (C). In addition, the interaction energies for the interaction between the adsorbate CH<sub>x</sub> species and catalyst  $E_{int}^{A-B}$  on clean Ni<sub>4</sub>/Al<sub>2</sub>O<sub>3</sub> increases form -2.92 eV (CH<sub>3</sub>), -4.28 eV (CH<sub>2</sub>), -6.64 eV(CH) to -9.03 (C). It is obvious that the difference of the deforming energies of CH<sub>x</sub> species  $E_A^{deform}$  is little and could be ignored. The deforming energies of the catalyst  $E_B^{deform}$  keep increasing trend with the dehydrogenation of the CH<sub>3</sub> species into C. The interaction between the catalyst and

the  $\text{CH}_x$   $E_{\text{int}}^{A-B}$  increases with the dehydrogenation of  $\text{CH}_3$  into the C species.

On K pre-adsorbed  $\text{Ni}_4/\text{Al}_2\text{O}_3$ , the deforming energies of  $\text{CH}_x$  species  $E_A^{\text{deform}}$  is approximate to each other. The deforming energies of catalyst  $E_B^{\text{deform}}$  increases from 0.18 eV( $\text{CH}_3$ ), 0.24 eV( $\text{CH}_2$ ), 0.84 eV( $\text{CH}$ ) to 6.97 eV (C). On the other hand, the interaction energies for the interaction between  $\text{CH}_x$  species and catalyst  $E_{\text{int}}^{A-B}$  increases from -3.18 eV ( $\text{CH}_3$ ), -4.97 eV ( $\text{CH}_2$ ), -7.40 eV ( $\text{CH}$ ) to -14.51 eV (C). The increasing interaction energies for the interaction between catalyst and  $\text{CH}_x$  species  $E_{\text{int}}^{A-B}$  could make up the increasing deforming energies of catalyst  $E_B^{\text{deform}}$ , which leads to the increasing adsorption energy of the  $\text{CH}_x$  species with the dehydrogenation steps going on.

In order to get the change of the deforming energy items and the interaction energy items with the addition of K, we compare the deforming energy items ( $E_A^{\text{deform}}$  and  $E_B^{\text{deform}}$ ) and the interaction energy item ( $E_{\text{int}}^{A-B}$ ) on clean and K pre-adsorbed  $\text{Ni}_4/\text{Al}_2\text{O}_3$ . From Table S2, we can observe that the difference of the deforming energies of the  $\text{CH}_x$  species on clean and K pre-adsorbed  $\text{Ni}_4/\text{Al}_2\text{O}_3$   $\Delta E_A^{\text{deform}}$  is negligible and should be ignored. For  $\text{CH}_3$  and  $\text{CH}_2$  species adsorption, the interaction energy for the interaction between the catalyst and  $\text{CH}_x$  on  $\text{Ni}_4/\text{K-Al}_2\text{O}_3$  is higher than that on clean  $\text{Ni}_4/\text{Al}_2\text{O}_3$  reflected by the negative interaction energy difference for the interaction between the catalyst and  $\text{CH}_x$  on K pre-adsorbed and clean  $\text{Ni}_4/\text{Al}_2\text{O}_3$   $\Delta E_{\text{int}}^{A-B}$ . Moreover, the more negative interaction energy difference  $\Delta E_{\text{int}}^{A-B}$  along the dehydrogenation from  $\text{CH}_3$  to  $\text{CH}_2$  species contributes to the more negative adsorption energy difference of  $\text{CH}_x$  species on K pre-adsorbed and clean  $\text{Ni}_4/\text{Al}_2\text{O}_3$ . For CH and C species adsorption, the deforming energy of the catalyst  $E_B^{\text{deform}}$  on K pre-adsorbed



$\text{Ni}_4/\text{Al}_2\text{O}_3$  is much higher than that on clean  $\text{Ni}_4/\text{Al}_2\text{O}_3$  reflected by the positive deforming energy difference of catalyst on  $\text{Ni}_4/\text{K-Al}_2\text{O}_3$  and clean  $\text{Ni}_4/\text{Al}_2\text{O}_3$   $\Delta E_B^{\text{deform}}$ . The more positive deforming energy difference  $\Delta E_B^{\text{deform}}$  along the dehydrogenation from CH to C species leads to the more positive adsorption energy difference of  $\text{CH}_x$  species on K pre-adsorbed and clean  $\text{Ni}_4/\text{Al}_2\text{O}_3$ .

In conclusion, the higher interaction between the catalyst and  $\text{CH}_x$  species on K pre-adsorbed  $\text{Ni}_4/\text{Al}_2\text{O}_3$   $E_{\text{int}}^{A-B}$  contributes to the promotion effect of K on the adsorption of  $\text{CH}_3$  and  $\text{CH}_2$  species. Furthermore, the increasing interaction difference between the catalyst and  $\text{CH}_x$  species on K pre-adsorbed and clean  $\text{Ni}_4/\text{Al}_2\text{O}_3$   $\Delta E_{\text{int}}^{A-B}$  leads to the increasing promotion effect of K on the adsorption energies of  $\text{CH}_3$  and  $\text{CH}_2$ . For the adsorption of CH and C, the higher deforming energy of  $\text{Ni}_4/\text{K-Al}_2\text{O}_3$   $E_B^{\text{deform}}$  leads to the inhibition effect of K on the adsorption of CH and C species. And the increasing deforming energy difference of catalyst on K pre-adsorbed and clean  $\text{Ni}_4/\text{Al}_2\text{O}_3$   $\Delta E_B^{\text{deform}}$  contributes to the increasing inhibition effect of K on the adsorption energies of CH and C species. Hence we will explore the insight of the increasing interaction energy difference between the  $\text{CH}_x$  species and the catalyst  $\Delta E_{\text{int}}^{A-B}$  and the increasing deforming energy difference of the catalyst  $\Delta E_B^{\text{deform}}$  in the next part.

#### S4 The physical origin of $\Delta E_{\text{int}}^{A-B}$ of $\text{CH}_x$ species

In order to get the insight of the interaction energies between the  $\text{CH}_x$  species and the catalyst  $E_{\text{int}}^{A-B}$ , we will divide the interaction energies into three parts:  $E_{\text{elstat}}$ ,  $E_{\text{Pauli}}$  and  $E_{\text{orb}}$  in equation (3). As the interaction energies between the  $\text{CH}_x$  species and the

catalyst  $E_{\text{int}}^{A-B}$  are negative (Table S2), the interaction between the  $\text{CH}_x$  species and the catalyst is attractive interaction rather than repulsion interaction. As a result, the interaction between  $\text{CH}_x$  species and the catalyst is mainly determined by  $E_{\text{elstat}}$  and  $E_{\text{orb}}$ . For the electrostatic interaction energy between the catalyst and  $\text{CH}_x$  ( $E_{\text{elstat}}$ ), as the  $\text{CH}_x$  species is mainly adsorbed through C with Ni and K, we mainly measure the electrostatic interaction between C and Ni (K). For the electrostatic interaction energy is proportional to  $\frac{Q_C Q_{\text{Ni(K)}}}{d_{\text{C-Ni(K)}}}$ , we measure the electrostatic interaction energy between the C and Ni (K) through  $\frac{Q_C Q_{\text{Ni(K)}}}{d_{\text{C-Ni(K)}}}$  shown in Figure S1(c). Compared with the electrostatic interaction between C and K, the electrostatic interaction between C and Ni is rather lower and should be ignored. The electrostatic interaction item  $\frac{Q_C Q_K}{d_{\text{C-K}}}$  between C and K increases from -0.08 ( $\text{CH}_3$ ), -0.14 ( $\text{CH}_2$ ), -0.16 ( $\text{CH}$ ) to -0.18 (C). The negative value between K and Ni indicates the attractive interaction between K and Ni. The electrostatic interaction between C and K keeps increasing trend along the dehydrogenation. However, the  $\Delta E_{\text{int}}^{A-B}$  will turn to decrease from  $\text{CH}_2$  to  $\text{CH}$  species. The increasing electrostatic interaction  $E_{\text{elstat}}$  between C and K could hardly fit the changing trend of  $\Delta E_{\text{int}}^{A-B}$ .

For the orbital overlapping energy  $E_{\text{orb}}$ , we use the crystal orbital Hamilton populations (COHPs)<sup>5-8</sup> to investigate the insight of the K effect on the orbital overlapping energy  $E_{\text{orb}}$  of  $\text{CH}_x$  species. The COHP curves of C-K, Ni-K and C-Ni interaction on K pre-adsorbed  $\text{Ni}_4/\text{Al}_2\text{O}_3$  are shown in Figure S2. The Integrated COHP (ICOHP) value could reflect the orbital interaction between two atoms. The

negative value corresponds to the stronger interaction between orbitals. The integrated COHP values for C-K, Ni-K and C-Ni interaction are established in Table S3.

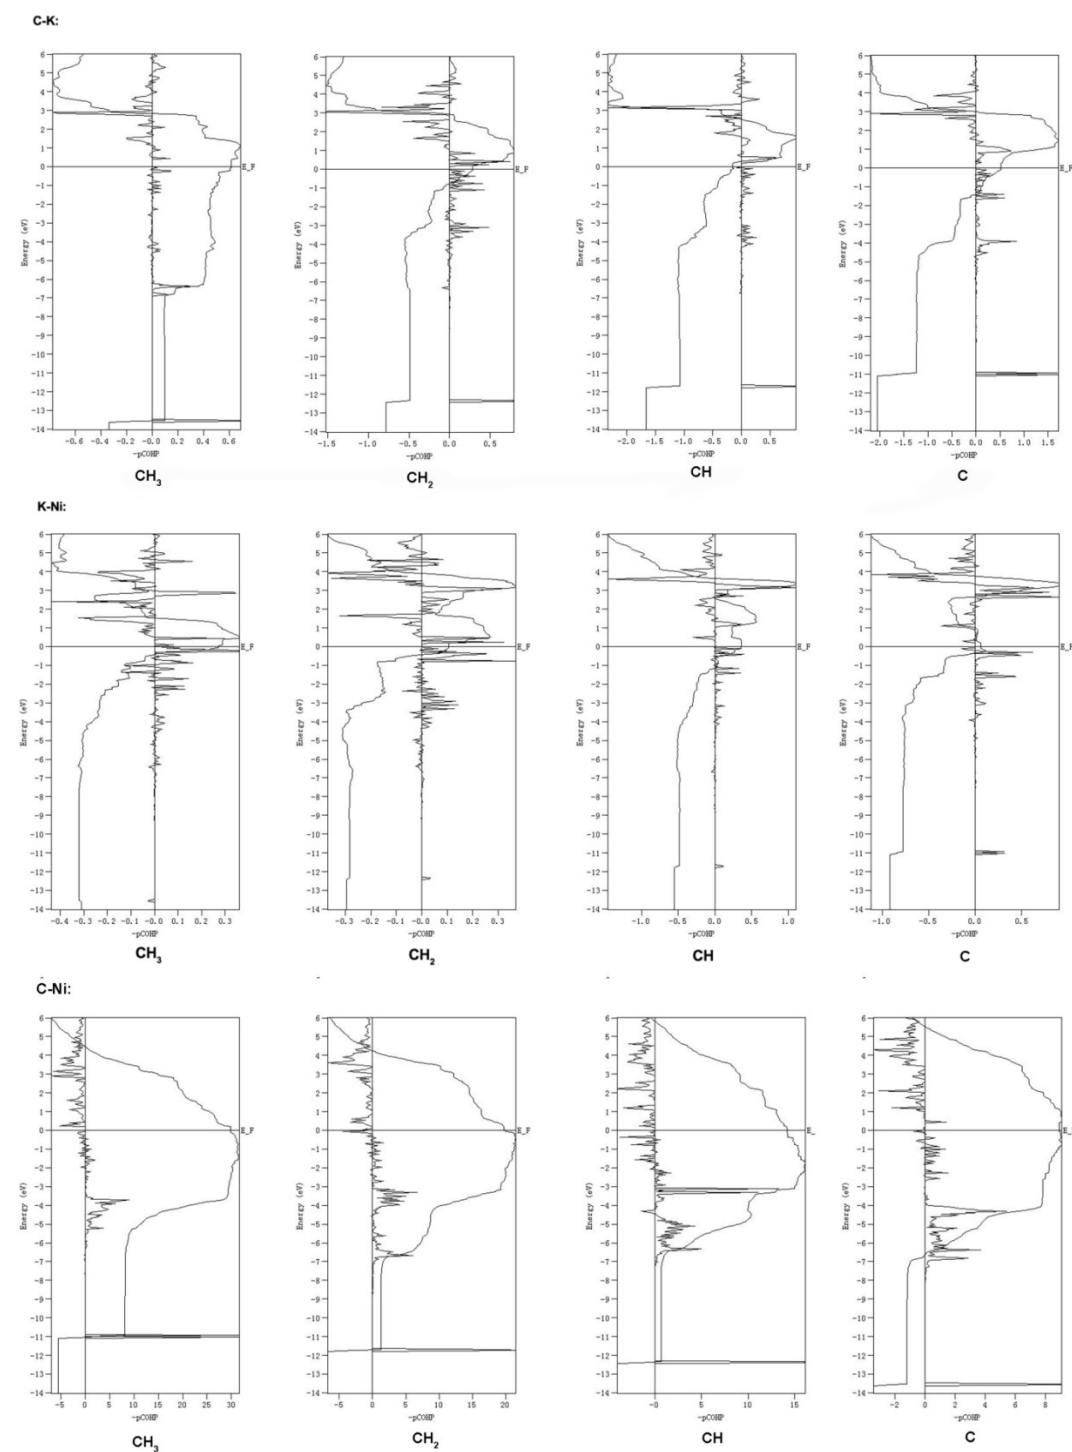

**Figure S2.** The COHP curves for the interaction between K and C, the interaction between K and Ni, and the interaction between C and Ni in CH<sub>3</sub>, CH<sub>2</sub>, CH and C species on Ni<sub>4</sub>/K-Al<sub>2</sub>O<sub>3</sub>;

**Table S3** Integrated COHPs (eV)

| Species         |                                                   | C-K   | K-Ni  | C-Ni  | $\Delta E_{\text{int}}^{A-B}$ | $\Delta\text{ICOHP}$ |
|-----------------|---------------------------------------------------|-------|-------|-------|-------------------------------|----------------------|
| CH <sub>3</sub> | Ni <sub>4</sub> /Al <sub>2</sub> O <sub>3</sub>   | -     | -     | -1.22 | -0.26                         | -0.11                |
|                 | Ni <sub>4</sub> /K-Al <sub>2</sub> O <sub>3</sub> | -0.03 | -0.04 | -1.34 |                               |                      |
| CH <sub>2</sub> | Ni <sub>4</sub> /Al <sub>2</sub> O <sub>3</sub>   | -     | -     | -1.56 | -0.43                         | -0.20                |
|                 | Ni <sub>4</sub> /K-Al <sub>2</sub> O <sub>3</sub> | -0.09 | -0.04 | -1.75 |                               |                      |
| CH              | Ni <sub>4</sub> /Al <sub>2</sub> O <sub>3</sub>   | -     | -     | -1.92 | -0.19                         | -0.09                |
|                 | Ni <sub>4</sub> /K-Al <sub>2</sub> O <sub>3</sub> | -0.05 | -0.08 | -2.01 |                               |                      |
| C               | Ni <sub>4</sub> /Al <sub>2</sub> O <sub>3</sub>   | -     | -     | -1.82 | -5.47                         | -0.48                |
|                 | Ni <sub>4</sub> /K-Al <sub>2</sub> O <sub>3</sub> | -0.14 | -0.08 | -2.30 |                               |                      |

Note:  $\Delta E_{\text{int}}^{A-B}$  refer to the energy difference of the interaction energies between the absorbed CH<sub>x</sub> species and catalyst geometry on K pre-adsorbed and clean Ni<sub>4</sub>/Al<sub>2</sub>O<sub>3</sub>. The  $\Delta\text{ICOHP}$  is the difference of the ICOHP value for the interaction between C and Ni neighboring K on K pre-adsorbed and clean Ni<sub>4</sub>/Al<sub>2</sub>O<sub>3</sub>.

On K pre-adsorbed Ni<sub>4</sub>/Al<sub>2</sub>O<sub>3</sub>, we find that the ICOHP values of the interaction between C and K are much lower than that for the interaction between C and Ni shown in Table S3. Hence, we will focus on the ICOHP values of the interaction between C and Ni. Furthermore, the ICOHP value of the interaction between C and Ni neighboring K is higher than that for the interaction between C and other Ni atoms. The ICOHP value for the interaction between C and Ni neighboring K majors the orbital interaction between CH<sub>x</sub> and the catalyst. We use the difference of the ICOHP values for the interaction between C and Ni neighboring K on K pre-adsorbed and that

for the corresponding C and Ni interaction on clean Ni<sub>4</sub>/Al<sub>2</sub>O<sub>3</sub> ( $\Delta$ ICOHP in Table S3) to measure the K effect on the orbital overlapping energies  $E_{orb}$ . The values of  $\Delta$ ICOHP change from -0.11 eV (CH<sub>3</sub>), -0.20 eV (CH<sub>2</sub>), -0.09 eV (CH) to -0.48 eV (C), the trend of which agrees well with that for the  $\Delta E_{int}^{A-B}$  shown in Figure S1d.

Based on the above discussion, it is concluded that K will promote the interaction between CH<sub>x</sub> species and catalyst through the  $E_{elstat}$  and  $E_{orb}$ : the increasing attractive electrostatic interaction between C and K and the increasing overlapping orbitals of C and Ni neighboring K. Furthermore, K will influence the interaction between CH<sub>x</sub> and catalyst mainly through enhancing the overlapping of the orbitals of C and Ni, which is different from the electrostatic interaction lying in the K inhibition effect in the previous study<sup>9</sup>. It could be explained: for the increasing electrostatic interaction between C and K ( $E_{elstat}$ ), K could donate electron to Ni neighboring K, and K will carry positive charge. From Table S4, it is observed that the positive charge of K almost remains +0.85 with the hydrogenation going on. On the other hand, with the hydrogenation steps going on, the C will bind to more Ni atoms and Ni will donate more electrons to C reflected by the more negative charge of C shown in Table S4. Therefore the attractive electrostatic interaction between C and K increases. For the increasing overlapping orbitals of C and Ni neighboring K ( $E_{orb}$ ), K could enhance the overlapping the orbitals of the Ni and C through donating more electron to Ni.

**Table S4.** The charge of atoms (C, K and Ni) on CH<sub>x</sub>-adsorbed Ni<sub>4</sub>/K-Al<sub>2</sub>O<sub>3</sub>

calculated by Bader Charge Analysis

| Species         | C     | K     | Ni    | Ni    | Ni    |
|-----------------|-------|-------|-------|-------|-------|
| CH <sub>3</sub> | -0.34 | +0.85 | +0.04 | +0.01 | -     |
| CH <sub>2</sub> | -0.52 | +0.84 | -0.07 | -0.01 | -     |
| CH              | -0.62 | +0.82 | -0.09 | +0.02 | +0.07 |
| C               | -0.69 | +0.85 | +0.08 | -0.04 | +0.00 |

Note: Only the charge of Ni atoms which are binding to CH<sub>x</sub> species is calculated.

**Table S5** Energy decomposition of  $E_{catalyst(Ni_4/K-Al_2O_3)}^{deform}$  on K pre-adsorbed Ni<sub>4</sub>/Al<sub>2</sub>O<sub>3</sub>  
(unit: eV)

| Species         | $E_{catalyst(Ni_4/Al_2O_3)}^{deform}$ | $E_{catalyst(Ni_4/K-Al_2O_3)}^{deform}$ | $\Delta E_K^{deform}$ | $\Delta E_{Ni_4/Al_2O_3}^{deform}$ | $\Delta E_{int}^{K-Ni_4/Al_2O_3}$ |
|-----------------|---------------------------------------|-----------------------------------------|-----------------------|------------------------------------|-----------------------------------|
| CH <sub>3</sub> | 0.10                                  | 0.18                                    | 0.00                  | 0.19                               | 0.00                              |
| CH <sub>2</sub> | 0.22                                  | 0.24                                    | -0.04                 | 0.13                               | 0.15                              |
| CH              | 0.57                                  | 0.84                                    | 0.00                  | 0.91                               | -0.07                             |
| C               | 1.34                                  | 6.97                                    | 0.00                  | 0.78                               | 6.20                              |

Note:  $E_{catalyst(Ni_4/K-Al_2O_3)}^{deform}$  ( $E_{catalyst(Ni_4/Al_2O_3)}^{deform}$ ) refers to the deforming energy of catalyst  $Ni_4/K-Al_2O_3$  ( $Ni_4/Al_2O_3$ );  $\Delta E_K^{deform}$  and  $\Delta E_{Ni_4/Al_2O_3}^{deform}$  refer to the deforming energy of K atom and the  $Ni_4/Al_2O_3$  geometry;  $\Delta E_{int}^{K-Ni_4/Al_2O_3}$  refer to the energy difference of the interaction energies between K and  $Ni_4/Al_2O_3$  on the  $CH_x$ -adsorbed and clean  $Ni_4/K-Al_2O_3$ .

**(d) The physical origin of  $\Delta E_B^{deform}$**  For the inhibition effect of K on the adsorption energy of CH and C, we find that it is the high deforming energies of catalyst causing the lower adsorption energies of CH and C species at the presence of K. In order to get the insight of the higher deforming energies of K pre-adsorbed  $Ni_4/Al_2O_3$ , we divided the deforming energy into the deforming energies of K and  $Ni_4/Al_2O_3$  and the changing interaction energy for the interaction between K and  $Ni_4/Al_2O_3$  in equation (4):

$$\Delta E_{catalyst}^{deform} = (E_K^{CHx} - E_K^{clean}) + (E_{Ni_4/Al_2O_3}^{CHx} - E_{Ni_4/Al_2O_3}^{clean}) + \Delta E_{int}^{K-Ni_4/Al_2O_3} = \Delta E_K^{deform} + \Delta E_{Ni_4/Al_2O_3}^{deform} + \Delta E_{int}^{K-Ni_4/Al_2O_3} \quad (4)$$

Where  $E_K^{CHx}$  and  $E_{Ni_4/Al_2O_3}^{CHx}$  refer to the energies of the K geometry and  $Ni_4/Al_2O_3$  geometry on  $CH_x$ -adsorbed  $Ni_4/K-Al_2O_3$ .  $E_K^{clean}$  and  $E_{Ni_4/Al_2O_3}^{clean}$  are denoted as the energies of the K geometry and  $Ni_4/Al_2O_3$  geometry on clean  $Ni_4/K-Al_2O_3$ .  $\Delta E_{int}^{K-Ni_4/Al_2O_3}$  refers to the difference of the interaction energy for the interaction between K and  $Ni_4/Al_2O_3$  on  $CH_x$ -adsorbed and clean  $Ni_4/K-Al_2O_3$ . The first two items  $\Delta E_K^{deform}$  and  $\Delta E_{Ni_4/Al_2O_3}^{deform}$  refer to the deforming energies of the K and  $Ni_4/Al_2O_3$  geometry on  $CH_x$ -adsorbed  $Ni_4/K-Al_2O_3$ . The last item  $\Delta E_{int}^{K-Ni_4/Al_2O_3}$  represents the changing interaction between  $Ni_4/Al_2O_3$  and K.

As shown in Table S5, the deforming energies of K  $\Delta E_K^{deform}$  on CH<sub>x</sub>-adsorbed Ni<sub>4</sub>/K-Al<sub>2</sub>O<sub>3</sub> are negligible. However, the deforming energies of Ni<sub>4</sub>/Al<sub>2</sub>O<sub>3</sub>  $\Delta E_{Ni_4/Al_2O_3}^{deform}$  turn to increase significantly in CH-adsorbed Ni<sub>4</sub>/K-Al<sub>2</sub>O<sub>3</sub>. It is the higher deforming energies of Ni<sub>4</sub>/Al<sub>2</sub>O<sub>3</sub> geometry  $\Delta E_{Ni_4/Al_2O_3}^{deform}$  leading to the lower adsorption energy of the CH species. The large deform of Ni<sub>4</sub>/Al<sub>2</sub>O<sub>3</sub> is caused by the steric hindrance lying in CH, Ni and K. For the C species, the difference of the interaction energy between K and Ni<sub>4</sub>/Al<sub>2</sub>O<sub>3</sub>  $\Delta E_{int}^{K-Ni_4/Al_2O_3}$  is much higher on C-adsorbed Ni<sub>4</sub>/K-Al<sub>2</sub>O<sub>3</sub> and is responsible for the inhibition effect of K on C adsorption. For K will interact with Ni<sub>4</sub>/Al<sub>2</sub>O<sub>3</sub> through the interaction between K and Ni, we will explore the interaction between K and Ni from three aspects:  $E_{elstat}$ ,  $E_{Pauli}$  and  $E_{orb}$ . For the electrostatic interaction energy  $E_{elstat}$  between K and Ni<sub>4</sub>/Al<sub>2</sub>O<sub>3</sub>, it is found that the electrostatic interaction energy between K and Ni is negative and is not responsible for the repulsion interaction between K and Ni. For the overlapping energy  $E_{orb}$ , the ICOHP value for the interaction between Ni and K is -0.08 eV on C-adsorbed Ni<sub>4</sub>/Al<sub>2</sub>O<sub>3</sub>, which indicates that the overlapping energy  $E_{orb}$  fails to explain the repulsion interaction between K and Ni<sub>4</sub>/Al<sub>2</sub>O<sub>3</sub>. Hence the repulsion interaction between the K and Ni<sub>4</sub>/Al<sub>2</sub>O<sub>3</sub> is responsible for the repulsion interaction between K and Ni<sub>4</sub>/Al<sub>2</sub>O<sub>3</sub>.

In conclusion, with the dehydrogenation steps going on, the CH and C species will bind to more Ni atoms, which could compete with the interaction between Ni and K yielding the steric repulsion. It is observed that the steric repulsion in CH(C)-adsorbed Ni<sub>4</sub>/K-Al<sub>2</sub>O<sub>3</sub> will increase significantly and lead to the deformation of the Ni<sub>4</sub>/K-



Al<sub>2</sub>O<sub>3</sub> reflected by larger values of  $\Delta E_{Ni_4/Al_2O_3}^{deform}$  on CH(C)-adsorbed Ni<sub>4</sub>/K-Al<sub>2</sub>O<sub>3</sub> shown in Table S5. The deformation of the Ni<sub>4</sub>/K-Al<sub>2</sub>O<sub>3</sub> mainly includes the deformation of Ni<sub>4</sub>/Al<sub>2</sub>O<sub>3</sub>  $\Delta E_{Ni_4/Al_2O_3}^{deform}$  and the displacement of K reflected by the interaction between Ni and K  $\Delta E_{int}^{K-Ni_4/Al_2O_3}$ . On CH-adsorbed Ni<sub>4</sub>/K-Al<sub>2</sub>O<sub>3</sub>, the K will bind to Ni stably, which leads to the deforming of Ni<sub>4</sub> to release the repulsion interaction yielding high deforming energy of Ni<sub>4</sub>/Al<sub>2</sub>O<sub>3</sub> ( $\Delta E_{Ni_4/Al_2O_3}^{deform}$ ). On C-adsorbed Ni<sub>4</sub>/K-Al<sub>2</sub>O<sub>3</sub>, the interaction between C and Ni grows stronger with the hydrogenation going on and turns stronger than that for K and Ni<sub>4</sub>/Al<sub>2</sub>O<sub>3</sub>, which will stabilize the Ni<sub>4</sub>/Al<sub>2</sub>O<sub>3</sub>. The deforming of Ni<sub>4</sub> decreases on C-adsorbed Ni<sub>4</sub>/K-Al<sub>2</sub>O<sub>3</sub> compared with that on CH-adsorbed Ni<sub>4</sub>/K-Al<sub>2</sub>O<sub>3</sub> reflected by the less deforming energy of Ni<sub>4</sub>/Al<sub>2</sub>O<sub>3</sub>  $\Delta E_{Ni_4/Al_2O_3}^{deform}$  (0.78 eV versus 0.91 eV for  $\Delta E_{Ni_4/Al_2O_3}^{deform}$  on C and CH-adsorbed Ni<sub>4</sub>/Al<sub>2</sub>O<sub>3</sub>, respectively). Instead, the repulsion interaction will be released by the displacement of K reflected by the longer distance of K-Ni on C-adsorbed Ni<sub>4</sub>/K-Al<sub>2</sub>O<sub>3</sub> than that on CH-adsorbed Ni<sub>4</sub>/K-Al<sub>2</sub>O<sub>3</sub> (3.14 Å and 3.36 Å for d(Ni-K) on CH and C-adsorbed Ni<sub>4</sub>/K-Al<sub>2</sub>O<sub>3</sub>, respectively) which corresponds to the larger repulsion interaction between K and Ni<sub>4</sub>  $\Delta E_{int}^{K-Ni_4/Al_2O_3}$ .

**Table S6** the charge of Ni on Ni<sub>4</sub> on clean and K pre-adsorbed Ni<sub>4</sub>/Al<sub>2</sub>O<sub>3</sub> shown in Figure 7

| catalyst                                        | Ni41  | Ni42  | Ni43  | Ni44  |
|-------------------------------------------------|-------|-------|-------|-------|
| Ni <sub>4</sub> /Al <sub>2</sub> O <sub>3</sub> | -0.10 | -0.05 | -0.10 | -0.19 |

---

|                                                  |       |       |       |       |
|--------------------------------------------------|-------|-------|-------|-------|
| Ni <sub>4</sub> /KAl <sub>2</sub> O <sub>3</sub> | -0.24 | -0.25 | -0.22 | -0.46 |
|--------------------------------------------------|-------|-------|-------|-------|

---

## References and Notes

1. B. Hammer, *Surface Science*, 2000, **459**, 323-348.
2. F. M. Bickelhaupt and E. J. Baerends, *Reviews in Computational Chemistry*, 2000, **15**, 1-86.
3. A. Kovács, C. Esterhuysen and G. Frenking, *Chemistry*, 2005, **11**, 1813-1825.
4. J. Poater, M. Sola and F. M. Bickelhaupt, *Chemistry*, 2006, **12**, 2889-2895.
5. V. L. Deringer, A. L. Tchougreeff and R. Dronskowski, *The Journal of Physical Chemistry. A*, 2011, **115**, 5461-5466.
6. S. Maintz, V. L. Deringer, A. L. Tchougreeff and R. Dronskowski, *J Comput Chem*, 2016, **37**, 1030-1035.
7. R. Dronskowski and P. E. Bloechl, *J.phys.chem*, 1993, **97**, 8617-8624.
8. S. Maintz, V. L. Deringer, A. L. Tchougréeff and R. Dronskowski, *Journal of Computational Chemistry*, 2013, **34**, 2557-2567.
9. H. S. Bengaard, I. Alstrup, I. Chorkendorff, S. Ullmann, J. R. Rostrup-Nielsen and J. K. Nørskov, *Journal of Catalysis*, 1999, **187**, 238-244
